# Supplementary material for: Spectrally resolved efficiencies of carbon monoxide (CO) photoproduction in the western Canadian Arctic: particles versus solutes
Source: Copernicus journal article supplement (doi:10.5194/bg-10-3731-2013), 2013-06-05
Supplement: Supplementary file 1 [file bg-10-3731-2013-supplement.pdf]

1

## Supplementary Material

2 **Fig. S1.** Comparison of CDOM absorption spectra before and after irradiation. A):  
3 Sta. 170, surface (1-h irradiation); B): Sta. 670, surface (1.5-h irradiation); C): Sta.  
4 135, DCM (3-h irradiation, the longest irradiation in this study for short cutoff filters).  
5 For unfiltered samples, they were filtered with 0.2- $\mu\text{m}$  Nylon syringe filters after  
6 irradiation. Note some lines are almost completely overlapped.

7

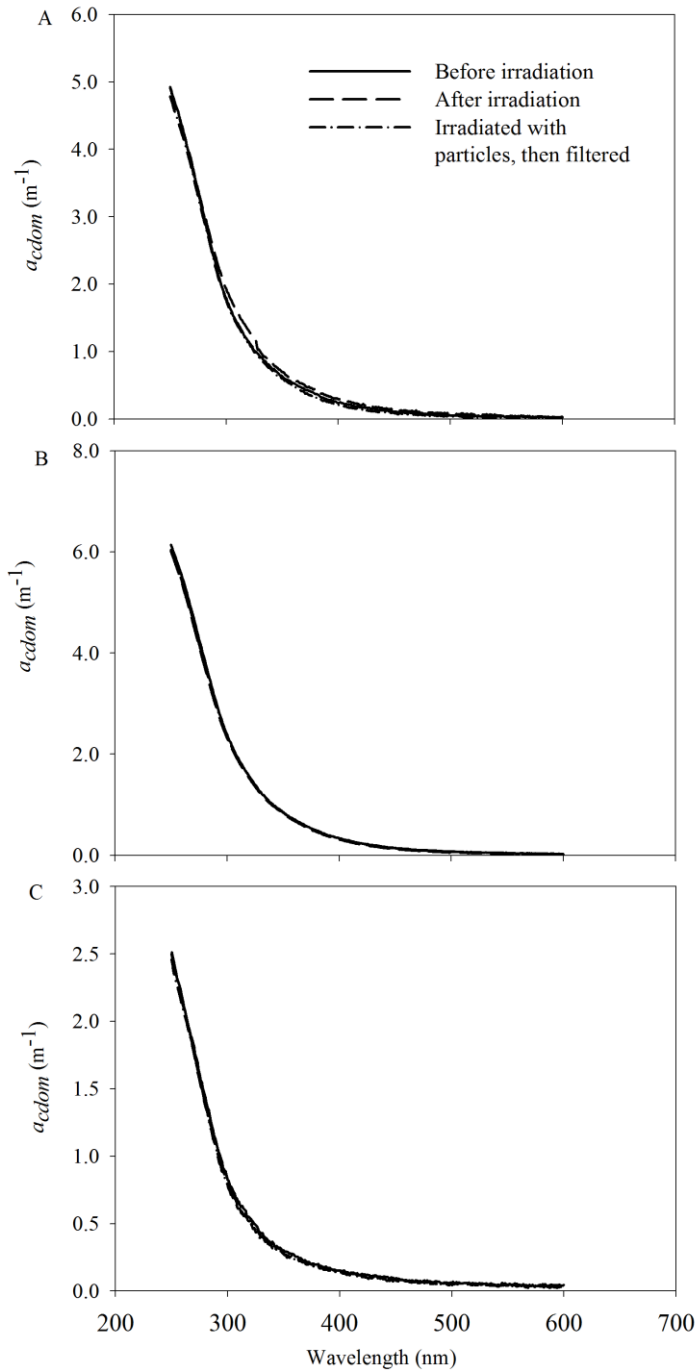

8

9

1 **Monte Carlo Simulation.** The quantum absorbed ( $Q_a$ ) by an optically significant  
2 constituent inside a quartz cell irradiated from above by a collimated light beam<sup>1</sup> can  
3 be estimated using Eq. (3) in the paper (abbreviated as Eq. (3) herein), as long as the  
4 light scattering is negligible relative to the absorption. Filtered seawater with  
5 dissolved organic matter (DOM) meets this requirement, since both seawater and  
6 DOM have low scattering and CDOM absorption coefficient in short wavelengths is  
7 large (i.e.  $b:a \sim 0$ ;  $b$ : scattering coefficient and  $a$ : absorption coefficient). Unfiltered  
8 seawater, however, may not meet this requirement, since scattering by particles can  
9 increase the path-length of some photons (i.e. path-length amplification, PA herein)  
10 but deflect some other photons out of the quartz cell in all directions (i.e. scattering  
11 loss, SL herein). Under this circumstance, Eq. (3) overestimates  $Q_a$  if  $SL > PA$  or  
12 underestimates  $Q_a$  if  $PA > SL$ . Here we assessed the effect of particle scattering on  
13 the quantity of photons absorbed using Monte Carlo (MC) simulations (SimulO  
14 software; Leymarie et al. 2010) and proposed a modification to Eq. (3) to account for  
15 the scattering effect.

16 MC was used to simulate the trajectories of collimated photons hitting a vertically  
17 placed cylindrical quartz cell (length: 114 mm, o.d.: 34 mm, wall thickness: 1.5mm,  
18 refractive index: 1.48) from above. The refractive index of pure seawater was set to  
19 be 1.34 and its inherent optical properties were taken from Morel (1974) and  
20 Buitelveld (1994). All photons scattered out of the cell's side wall were assumed to be  
21 totally absorbed by the black electric tape that wrapped the cell. The reflection from  
22 the bottom quartz window was ignored since it was in contact with a black plastic  
23 block. The particle phase function was given by the Fournier-Forand model (Fournier  
24 and Forand, 1994; Mobley et al., 2002) with a backscattering ratio of 2.2%. This  
25 backscattering ratio is within the range observed by Doxaran et al. (2012) in the study  
26 area.

27 Absorption and scattering coefficient values used in our simulations cover the  
28 large ranges encountered during the Malina cruise ( $a_t$ : 0.045–47.2  $\text{m}^{-1}$ ;  $b$ : 0.056–241.5  
29  $\text{m}^{-1}$ ;  $b/a_t$ : 0.12–20.4). The total absorption ( $a_t$ ,  $\text{m}^{-1}$ ) coefficient is the sum of pure  
30 seawater, CDOM and particle absorption coefficients, whereas scattering coefficient  
31 ( $b$ ,  $\text{m}^{-1}$ ) is only the particle scattering coefficient. Scattering by pure water was  
32 neglected as it was several orders of magnitude lower than  $a_t$  or  $b$ . For each  
33 simulation (i.e. a given set of  $b$  and  $a_t$ ). The SimulO software computed the number of  
34 photons absorbed within the water body, taking into account all scattering and  
35 reflection processes. Then, this number was compared to the number of absorbed  
36 photons calculated from Eq. (3) without accounting for the scattering effect.

37 For a given  $a_t$ , the ratio ( $R$ ) of the number of absorbed photons calculated using Eq.  
38 (3) to that from the MC simulation is found to be linearly correlated to  $b:a_t$  within the  
39 range of 0 to 25 (Fig. S2):

$$40 \quad R = S \times \left(\frac{b}{a_t}\right) + 1 \quad (\text{S1})$$

41 where  $S$  is the regressed slope.  $S$  increases with  $a_t$  in a manner of exponential rise to  
42 maximum (Fig. S3) as expressed by Eq. (S2):

$$43 \quad S = 0.0539(1 - e^{-0.191a_t}) \quad (\text{S2})$$

45

---

<sup>1</sup> Justification of collimated light reaching the sample's surface in the quartz cell can be found in the Support Information of the study by Zhang et al. (2006). This is also confirmed by a direct comparison between the multispectral irradiation system as adopted in our study and a monochromatic system in the measurement of CO AQY (Ziolkowski and Miller, 2007).

1  $R$  for our Malina samples can thus be calculated from Eqs. (S1) and (S2) with  
 2 known values of  $a_t$  and  $b$ ;  $a_t$  is from our own study while  $b$  is from the study of  
 3 Doxaran et al. (2012). Fig. S4 shows  $R$  as a function of wavelength. The scattering  
 4 effect (i.e.  $R-1$ ) was  $\leq 0.3\%$  in the CB and  $\leq 1.9\%$  on the MS, including two outermost  
 5 stations along the SGTs (Sta. 392 and 691). Samples from the remaining SGT stations  
 6 had larger  $a_t$  values (1.00–10.45  $\text{m}^{-1}$  at 412 nm) and higher scattering to absorption  
 7 ratios (2.8–9.8 at 412 nm). The scattering effect for these stations ranged from 2.0%  
 8 to 27.8%, depending on sampling location and wavelength. The effect was positive,  
 9 indicating SL was larger than PA.

10

11 Fig. S2. Ratio ( $R$ ) of the number of absorbed photons calculated using Eq. (3) to that  
 12 from the MC simulation at various  $b:a_t$  and  $a_t$  values.

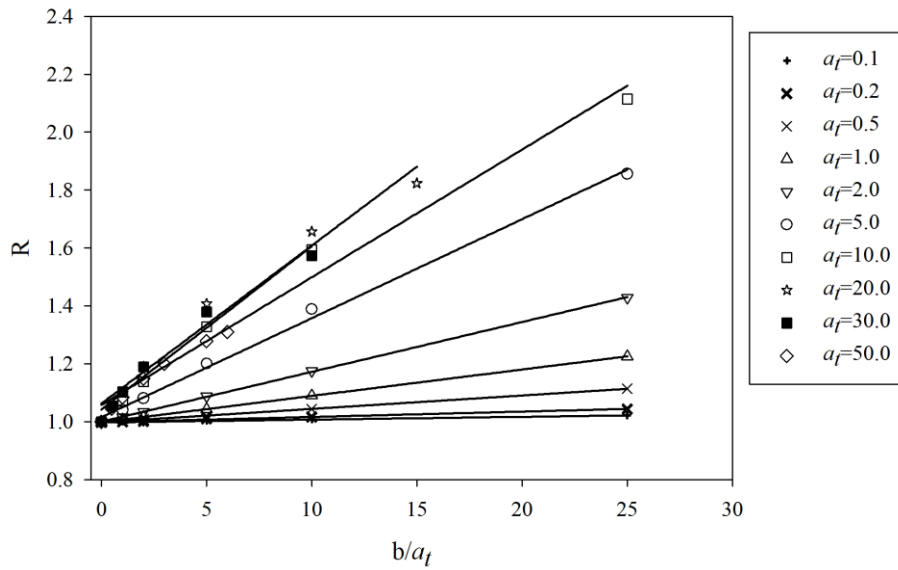

13

14 Fig. S3. Regressed slope ( $S$ ) in Fig. S2 as a function of  $a_t$ .

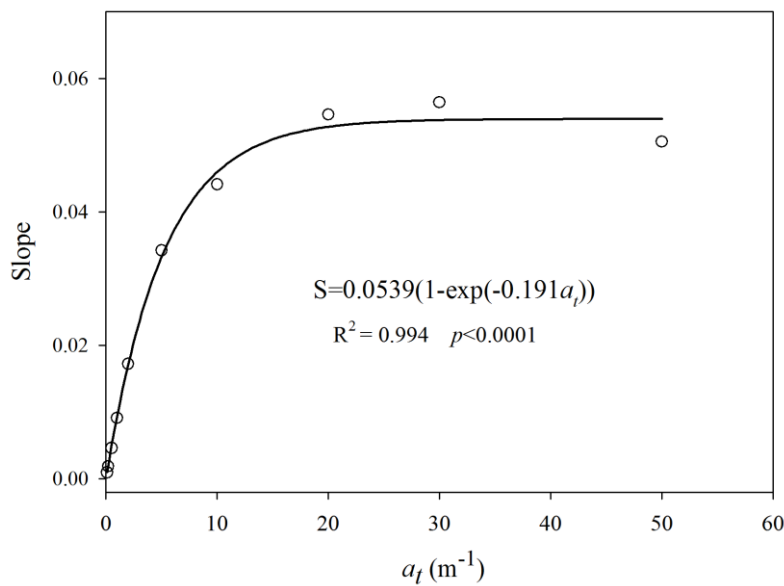

15

1 Fig. S4.  $R$  as a function of wavelength for Malina samples. Stations with  $R \geq 2\%$  are  
 2 presented individually while stations with  $R < 2\%$  are presented by mean values. Mean  
 3 value for the MS include two outermost stations (Sta. 392 and 691) along the salinity  
 4 gradient transects.

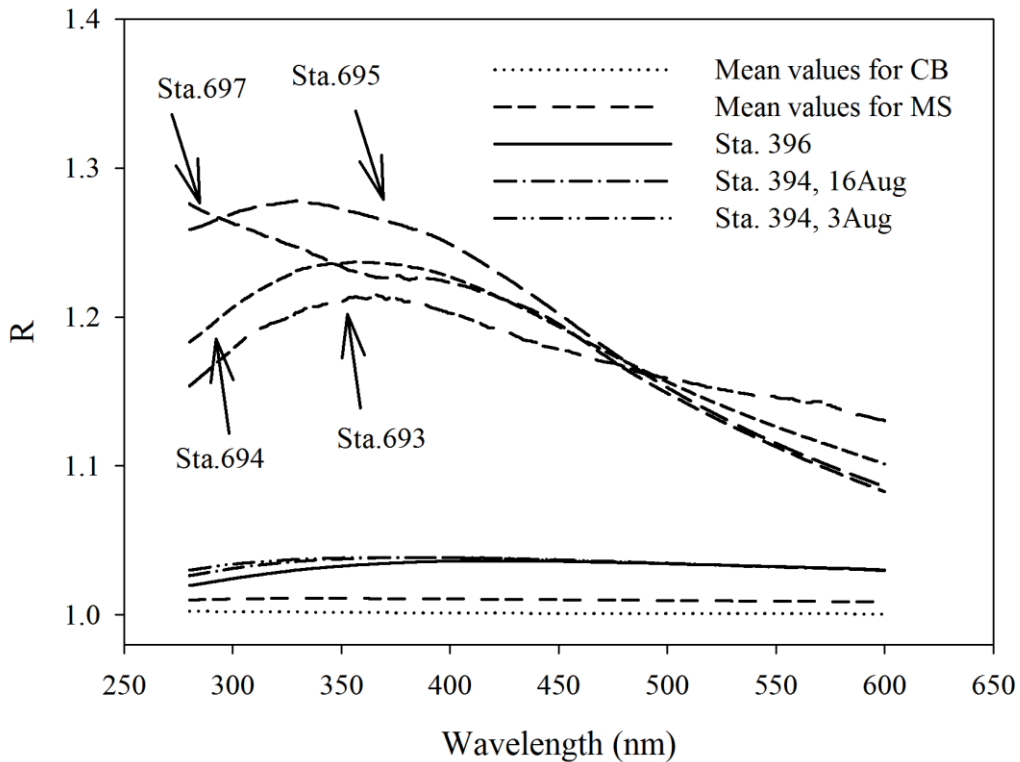

5  
 6  
 7  
 8  
 9  
 10  
 11  
 12

**Derivation of the absorption coefficient of minerals.** Following the method of Moate et al. (2012), the mass-specific absorption coefficient of suspended minerals,  $a_M^*$  ( $\text{m}^2 \text{g}^{-1}$ ), for the estuarine transect samples was derived by the regression of the non-algal particulate absorption coefficient ( $a_{nap}$ ) against the concentration of suspended minerals,  $M$  ( $\text{g m}^{-3}$ ), in the form of

$$a_{nap,\lambda} = a_{0,\lambda} + a_M^* \times M$$

13  
 14  
 15  
 16  
 17  
 18  
 19  
 20  
 21  
 22  
 23  
 24  
 25  
 26  
 27  
 28

where  $a_0$  ( $\text{m}^{-1}$ ) represents the organic particle absorption not removed by the methanol treatment.  $M$  was calculated as the difference between the total suspended particulate matter (SPM) and the particulate organic matter (POM). POM was estimated as 2.6 times the particulate organic carbon (POC) (Copin-Montégut, 1980; Martin et al., 1993). The  $a_{nap}$ , SPM, and POC data, separately collected by Doxaran et al. (2012) from the SGTs during the same cruise, were used to perform the regression of  $a_{nap}$  on  $M$  (since our own study did not measure SPM and POC). The regression result for wavelength at 330 nm is shown in Fig. S5A and the derived  $a_M^*$  (and  $a_0$ ) as a function of wavelength are shown in Fig. S5B. The mineral absorption coefficients for the salinity transect samples can thus be calculated as  $a_M^* \times M$ . The spectral shape and values of  $a_M^*$  obtained in the present study are comparable to those in the Conwy and Mersey estuaries of the Irish Sea (Moate et al., 2012). They also mimic the  $a_M^*$  spectra of Saharan dusts in red rain collected at the Mediterranean coast in France (Babin and Stramski, 2004). Because  $a_{nap}$  showed no significant relationship to the mineral concentration in the shelf and offshore water samples (data not shown), it was not

1 possible to obtain the  $a_M^*$  of these samples from the regression method described  
 2 above. The upper limits of their mineral absorption coefficients can, however, be  
 3 estimated as the difference between the total particle absorption coefficient ( $a_p$ ) and  
 4 phytoplankton absorption coefficient ( $a_{phy}$ ).

5  
 6 Fig. S5. Regression of  $a_{nap}$  at 330 nm against the mineral concentration (A) and the  
 7 derived  $a_M^*$  and  $a_0$  (B).  
 8

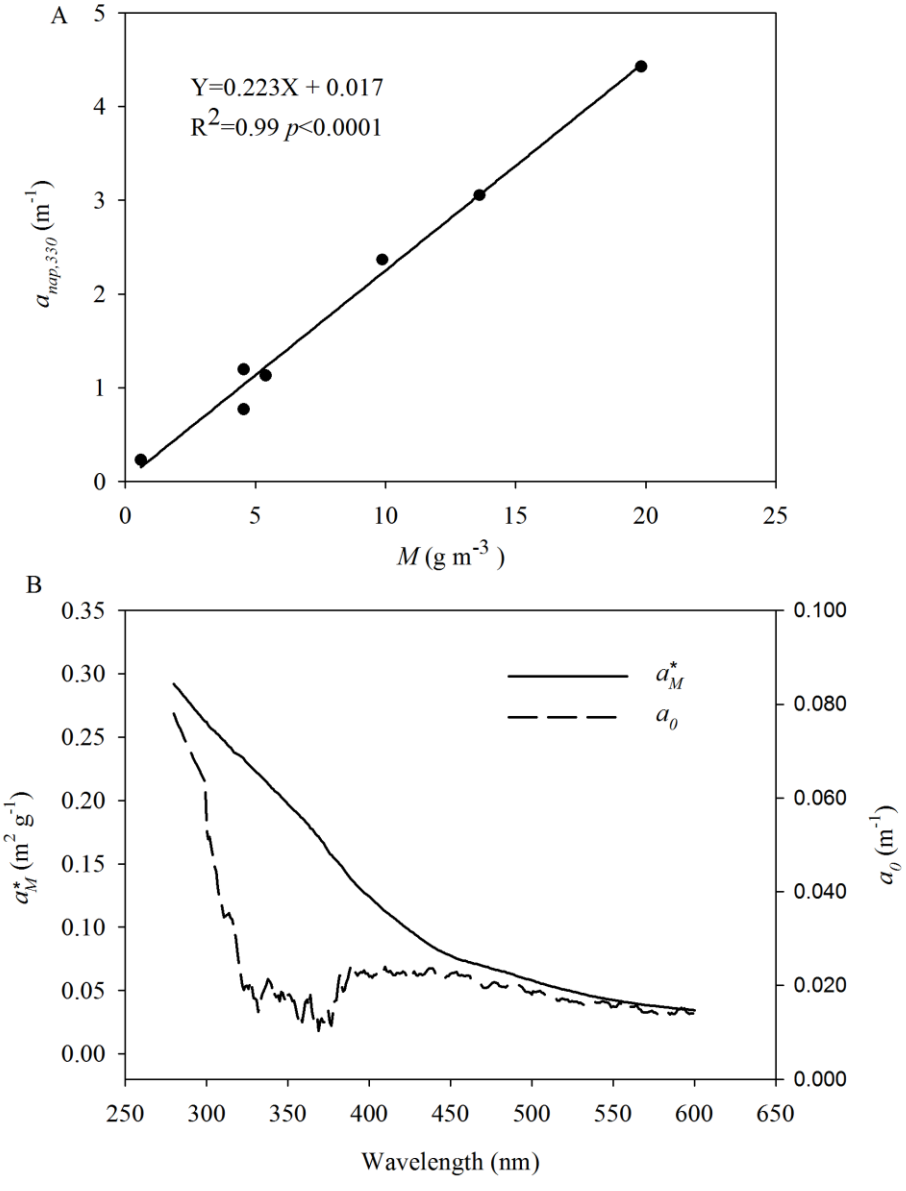

9  
 10  
 11

12 **References**

13 Babin, M, and Stramski, D.: Variations in the mass-specific absorption coefficient of  
 14 mineral particles suspended in water, *Limnol. Oceanogr.*, 49, 756-767, 2004.  
 15 Buiteveld, H., Hakvoort, J. M. H., and Donze, M.: The optical properties of pure  
 16 water, in: SPIE proceeding on ocean optics XII. The Society of Photo-Optical  
 17 Instrumentation Engineers, edited by: Jaffe, J. S., 174-183, 1994.

- 1 Doxaran, D., Ehn, J., Bélanger, S., Matsuoka, A., Hooker, S., and Babin, M.: Optical  
2 characterization of suspended particles in the Mackenzie River plume (Canadian  
3 Arctic Ocean) and implications for ocean colour remote sensing, *Biogeosciences*, 9,  
4 3213-3229, 2012.
- 5 Fournier, G., and Forand, J. L.: Analytic phase function for ocean water, *Proc. SPIE*,  
6 2258, 194–201, 1994.
- 7 Leymarie, E. , Doxaran, D., and Babin, M.: Uncertainties associated to measurements  
8 of inherent optical properties in natural waters, *Applied Optics*, 49, 5415-5436, 2010.
- 9 Moate, B. D., Bowers, D. G., and Thomas, D. N.: Measurements of mineral particle  
10 optical absorption properties in turbid estuaries: Intercomparison of methods and  
11 implications for optical inversions, *Estuarine, Coastal and Shelf Science*, 99, 95-107,  
12 2012.
- 13 Mobley, C. D., Sundman, L. K., and Boss, E., Phase function effects on oceanic light  
14 fields, *Appl. Opt.*, 41, 1035–1050, 2002.
- 15 Morel, A: Optical properties of pure water and pure seawater, in *Optical Aspects of*  
16 *Oceanography*, edited by Jerlov N. G., and Nielsen, E. S., Academic, 1–24., 1974.
- 17 Zhang, Y., Xie, H., and Chen, G.: Factors affecting the efficiency of carbon monoxide  
18 photoproduction in the St. Lawrence Estuarine system (Canada), *Environ. Sci.*  
19 *Technol.*, 40, 7771-7777, 2006.
- 20 Ziolkowski, L. A., and Miller W. L.: Variability of the apparent quantum efficiency of  
21 CO photoproduction in the Gulf of Maine and Northwest Atlantic, *Mar. Chem.*, 105,  
22 258-270, 2007.
